# Supplementary material
Source: MDPI journal article supplement (https://www.mdpi.com/2571-8797/5/1/3)
Supplement: s1 [file s1]

## Appendix 1

### MECHANISTIC MODEL TO SIMULATE MICROALGAE GROWTH

This ordinary differential equation (ODE)-based model for microalgae growth was adopted from the work of Solimeno, Samsó [1]: Solimeno, A., et al., *New mechanistic model to simulate microalgae growth*. Algal Research, 2015. **12**: p. 350-358. This model follows the same structure as the ADM1 and ASM3 formulated by the International Water Association.

The reaction rate for each component of the model  $r_i$  is formulated using the following expression:  $r_i = \sum_j (v_{j,i} \times \rho_i)$ , where  $i$  is the chemical component,  $j$  is the process,  $\rho_i$  is the rate expression for  $i$ , and  $v_{j,i}$  is the stoichiometric coefficient.

The ODEs for each model variable is consequently formulated as:

$$\frac{dS_i}{dt} = \frac{q_{in}}{V_{liq}} (S_{i,in} - S_i) + \sum_j (v_{j,i} \times \rho_i)$$

$$\frac{dX_i}{dt} = \frac{q_{in}}{V_{liq}} (X_{i,in} - X_i) + \sum_j (v_{j,i} \times \rho_i)$$

Key definitions for algae model:

$$\text{Photosynthetic factor: } \eta_{PS}(I, S_{O_2}) = f_L(I) \cdot f_{PR}(S_{O_2})$$

where  $f_L$  is the light factor and  $f_{PR}$  the photorespiration factor.

$f_L(I) = \frac{\alpha \delta I}{\alpha \beta I^2 + (\alpha + \beta) \delta I + \gamma \delta}$ ,  $\alpha$  is rate of activation,  $\gamma$  is rate of constant production,  $\beta$  is rate of inhibition,  $\delta$  is rate of recovery

$$f_{PR}(S_{O_2}) = \begin{cases} 1 - \tanh\left(\frac{K_{PR} \cdot \left(\frac{S_{O_2}}{\tau \cdot S_{O_2}^{SAT}}\right)}{1 - \frac{S_{O_2}}{\tau \cdot S_{O_2}^{SAT}}}\right), & S_{O_2} \leq \tau \cdot S_{O_2}^{SAT} \\ 0, & S_{O_2} > \tau \cdot S_{O_2}^{SAT} \end{cases}$$

where  $\tau$  is the coefficient of excess dissolved oxygen.

$$\text{Thermic photosynthetic factor: } f_{T,FS}(T) = e^{-\left(\frac{T - T_{opt}}{s}\right)^2}$$

where  $T_{opt}$  is assumed 25°C and  $s$  is a parameter value for empirical fitting

**Table 1. Process rate expressions.**

| Processes:                                               | Process rate expression                                                                                                                                                                                                                                                   |
|----------------------------------------------------------|---------------------------------------------------------------------------------------------------------------------------------------------------------------------------------------------------------------------------------------------------------------------------|
| Microalgae growth on ammonia                             | $\rho_{1a} = \mu_{ALG} * f_{T,FS}(T) * \eta_{PS}(I, S_{O2}) * \frac{S_{CO2} + S_{HCO3}}{K_{C,ALG} + S_{CO2} + S_{HCO3} + \left(\frac{S_{CO2}^2}{I_{CO2,ALG}}\right)} * \frac{S_{NH3} + S_{NH4}}{K_{N,ALG} + S_{NH3} + S_{NH4}} * X_{ALG}$                                 |
| Microalgae growth on nitrate                             | $\rho_{1b} = \mu_{ALG} * f_{T,FS}(T) * \eta_{PS}(I, S_{O2}) * \frac{S_{CO2} + S_{HCO3}}{K_{C,ALG} + S_{CO2} + S_{HCO3} + \left(\frac{S_{CO2}^2}{I_{CO2,ALG}}\right)} * \frac{S_{NO3}}{K_{N,ALG} + S_{NO3}}$ $* \frac{K_{N,ALG}}{K_{N,ALG} + S_{NH3} + S_{NH4}} * X_{ALG}$ |
| Microalgae endogenous respiration                        | $\rho_2 = k_{resp,ALG} * f_{T,FS}(T) * \frac{S_{O2}}{K_{O2,ALG} + S_{O2}} * X_{ALG}$                                                                                                                                                                                      |
| Microalgae inactivation                                  | $\rho_3 = k_{death,ALG} * f_{T,FS}(T) * X_{ALG}$                                                                                                                                                                                                                          |
| Chemical equilibrium $CO_2 \leftrightarrow HCO_3^-$      | $\rho_4 = k_{eq,1} * (S_{CO2} - \frac{S_H S_{HCO3}}{K_{eq,1}})$                                                                                                                                                                                                           |
| Chemical equilibrium $HCO_3^- \leftrightarrow CO_3^{2-}$ | $\rho_5 = k_{eq,2} * (S_{HCO3} - \frac{S_H S_{CO3}}{K_{eq,2}})$                                                                                                                                                                                                           |
| Chemical equilibrium $NH_4^+ \leftrightarrow NH_3$       | $\rho_6 = k_{eq,3} * (S_{NH4} - \frac{S_H S_{NH3}}{K_{eq,3}})$                                                                                                                                                                                                            |
| Chemical equilibrium $H^+ \leftrightarrow OH^-$          | $\rho_7 = k_{eq,w} * (1 - \frac{S_H S_{OH}}{K_{eq,w}})$                                                                                                                                                                                                                   |
| Oxygen transfer to the atmosphere                        | $\rho_{O2} = Ka, O_2 * (S_{O2}^{WAT} - S_{O2})$                                                                                                                                                                                                                           |
| Carbon dioxide transfer to the atmosphere                | $\rho_{CO2} = Ka, CO_2 * (S_{CO2}^{WAT} - S_{CO2})$                                                                                                                                                                                                                       |
| Ammonia transfer to the atmosphere                       | $\rho_{NH3} = Ka, NH_3 * (S_{NH3}^{WAT} - S_{NH3})$                                                                                                                                                                                                                       |

**Table 2. Matrix of stoichiometric parameters that relates processes through stoichiometric coefficients**

| State variables→i                                        |              | $S_{NH4}$         | $S_{NH3}$         | $S_{NO3}$         | $S_{O2}$                        | $S_{CO2}$         | $S_{HCO3}$        | $S_{CO3}$         | $S_H$             | $S_{OH}$          | $X_{ALG}$           |
|----------------------------------------------------------|--------------|-------------------|-------------------|-------------------|---------------------------------|-------------------|-------------------|-------------------|-------------------|-------------------|---------------------|
| Processes↓j                                              |              | gNm <sup>-3</sup> | gNm <sup>-3</sup> | gNm <sup>-3</sup> | gO <sub>2</sub> m <sup>-3</sup> | gCm <sup>-3</sup> | gCm <sup>-3</sup> | gCm <sup>-3</sup> | gHm <sup>-3</sup> | gHm <sup>-3</sup> | gCODm <sup>-3</sup> |
| Microalgae growth on ammonia                             | $\rho_{1a}$  | $v_{1,1a}$        |                   |                   | $v_{4,1a}$                      | $v_{5,1a}$        |                   |                   | $v_{8,1a}$        |                   | $v_{10,1a}$         |
| Microalgae growth on nitrate                             | $\rho_{1b}$  |                   |                   | $v_{3,1b}$        | $v_{4,1b}$                      | $v_{5,1b}$        |                   |                   | $v_{8,1b}$        |                   | $v_{10,1b}$         |
| Microalgae endogenous respiration                        | $\rho_2$     | $v_{1,2}$         |                   |                   | $v_{4,2}$                       | $v_{5,2}$         |                   |                   | $v_{8,2}$         |                   | $v_{10,2}$          |
| Microalgae inactivation                                  | $\rho_3$     | $v_{1,3}$         |                   |                   | $v_{4,3}$                       | $v_{5,3}$         |                   |                   | $v_{8,3}$         |                   | $v_{10,3}$          |
| Chemical equilibrium $CO_2 \leftrightarrow HCO_3^-$      | $\rho_4$     |                   |                   |                   |                                 | $v_{5,4}$         | $v_{6,4}$         |                   | $v_{8,4}$         |                   |                     |
| Chemical equilibrium $HCO_3^- \leftrightarrow CO_3^{2-}$ | $\rho_5$     |                   |                   |                   |                                 |                   | $v_{6,5}$         | $v_{7,5}$         | $v_{8,5}$         |                   |                     |
| Chemical equilibrium $NH_4^+ \leftrightarrow NH_3$       | $\rho_6$     | $v_{1,6}$         | $v_{2,6}$         |                   |                                 |                   |                   |                   | $v_{8,6}$         |                   |                     |
| Chemical equilibrium $H^+ \leftrightarrow OH^-$          | $\rho_7$     |                   |                   |                   |                                 |                   |                   |                   | $v_{8,7}$         | $v_{9,7}$         |                     |
| Oxygen transfer to the atmosphere                        | $\rho_{O2}$  |                   |                   |                   | $v_{4,O2}$                      |                   |                   |                   |                   |                   |                     |
| Carbon dioxide transfer to the atmosphere                | $\rho_{CO2}$ |                   |                   |                   |                                 | $v_{5,CO2}$       |                   |                   |                   |                   |                     |
| Ammonia transfer to the atmosphere                       | $\rho_{NH3}$ |                   | $v_{2,NH3}$       |                   |                                 |                   |                   |                   |                   |                   |                     |

**Table 3. Values of biokinetic and physic parameters.**

| Parameters                                 | Description                                         | Value                 | Unit                        | Source     |
|--------------------------------------------|-----------------------------------------------------|-----------------------|-----------------------------|------------|
| <b>Microalgae processes</b>                |                                                     |                       |                             |            |
| $\mu_{\text{ALG}}$                         | Maximum growth rate of microalgae                   | 1.6                   | $\text{d}^{-1}$             | Calibrated |
| $k_{\text{resp,ALG}}$                      | Endogenous respiration constant                     | 0.1                   | $\text{d}^{-1}$             | [49]       |
| $k_{\text{death,ALG}}$                     | Inactivation constant                               | 0.1                   | $\text{d}^{-1}$             | [49]       |
| $K_{\text{C,ALG}}$                         | Affinity constant of microalgae on carbon species   | 0.00432               | $\text{gC m}^{-3}$          | [43]       |
| $I_{\text{CO}_2,\text{ALG}}$               | $\text{CO}_2$ inhibition constant of microalgae     | 120                   | $\text{gC m}^{-3}$          | [53]       |
| $K_{\text{N,ALG}}$                         | Affinity constant of microalgae on nitrogen species | 0.1                   | $\text{gN m}^{-3}$          | [49]       |
| $K_{\text{O}_2,\text{ALG}}$                | Affinity constant of microalgae on dissolved oxygen | 0.2                   | $\text{gO}_2 \text{m}^{-3}$ | [49]       |
| <b>Photorespiration factor</b>             |                                                     |                       |                             |            |
| $K_{\text{PR}}$                            | Inhibition constant of photorespiration             | 0.01                  | —                           | Assumption |
| $\tau$                                     | Coefficient of excess dissolved oxygen              | 4                     | —                           | [15]       |
| $S_{\text{O}_2}^{\text{SAT}}$              | Saturation concentration of oxygen in the air       | 7.1904                | $\text{gO}_2 \text{m}^{-3}$ | [14]       |
| <b>Photosynthetic thermal factor</b>       |                                                     |                       |                             |            |
| $T_{\text{OPT}}$                           | Optimum temperature for microalgae growth           | 25                    | $^{\circ}\text{C}$          | [19]       |
| $s$                                        | Normalized parameter                                | 13                    | —                           | [19]       |
| <b>Light factor</b>                        |                                                     |                       |                             |            |
| $\alpha$                                   | Parameter activation                                | 0.001935              | $(\mu\text{E m}^{-2})^{-1}$ | [58]       |
| $\beta$                                    | Parameter inhibition                                | $5.7848\text{E}^{-7}$ | $(\mu\text{E m}^{-2})^{-1}$ | [58]       |
| $\gamma$                                   | Parameter production                                | 0.1460                | $\text{s}^{-1}$             | [58]       |
| $\delta$                                   | Parameter recovery                                  | 0.0004796             | $\text{s}^{-1}$             | [58]       |
| <b>Irradiance solar incident</b>           |                                                     |                       |                             |            |
| $E_f$                                      | Photosynthetic efficiency of solar radiation        | 1.74                  | $\mu\text{E J}^{-1}$        | [38]       |
| $\kappa$                                   | Index atmospheric clarity                           | 0.74                  | —                           | [38]       |
| $\zeta$                                    | Universal solar constant                            | 1353                  | $\text{W m}^{-2}$           | [38]       |
| $\omega$                                   | Hour angle                                          | Calculated            | $^{\circ}$                  | [36]       |
| $\omega_s$                                 | Sunset hour angle                                   | Calculated            | $^{\circ}$                  | [36]       |
| $\phi$                                     | Latitude                                            | Observed              | $^{\circ}$                  | -          |
| $\delta$                                   | Sun declination                                     | Calculated            | $^{\circ}$                  | [36]       |
| <b>Transfer of gases to the atmosphere</b> |                                                     |                       |                             |            |
| $K_{\text{a,O}_2}$                         | Mass transfer coefficient for oxygen                | 4                     | $\text{d}^{-1}$             | Calibrated |
| $K_{\text{a,CO}_2}$                        | Mass transfer coefficient for dioxide carbon        | 0.7                   | $\text{d}^{-1}$             | Calibrated |
| $K_{\text{a,NH}_3}$                        | Mass transfer coefficient for ammonia               | 0.7                   | $\text{d}^{-1}$             | Calibrated |

**Table 4. Values of chemical parameters.**

| Parameters                                                             | Equations                                                                       |
|------------------------------------------------------------------------|---------------------------------------------------------------------------------|
| Chemical equilibrium $\text{CO}_2 \leftrightarrow \text{HCO}_3^-$      | $K_{\text{eq},1} = 10^{17.843 - \frac{3404.71}{273.15+T} - 0.032786(273.15+T)}$ |
| Chemical equilibrium $\text{HCO}_3^- \leftrightarrow \text{CO}_3^{2-}$ | $K_{\text{eq},2} = 10^{9.494 - \frac{2902.39}{273.15+T} - 0.02379(273.15+T)}$   |
| Chemical equilibrium $\text{NH}_4^+ \leftrightarrow \text{NH}_3$       | $K_{\text{eq},3} = 10^{2.891 - \frac{2727}{(273.15+T)}}$                        |
| Chemical equilibrium $\text{H}^+ \leftrightarrow \text{OH}^-$          | $K_{\text{eq},w} = 10^{\frac{4470.99}{273.15+T} + 12.0875 - 0.01706(273.15+T)}$ |

| Kinetics parameters |                                                              |       |                     |      |
|---------------------|--------------------------------------------------------------|-------|---------------------|------|
| $k_{eq,1}$          | Dissociation constant of $CO_2 \leftrightarrow HCO_3^-$      | 10000 | $d^{-1}$            | [49] |
| $k_{eq,2}$          | Dissociation constant of $HCO_3^- \leftrightarrow CO_3^{2-}$ | 1000  | $d^{-1}$            | [49] |
| $k_{eq,3}$          | Dissociation constant of $NH_4^+ \leftrightarrow NH_3$       | 1000  | $d^{-1}$            | [49] |
| $k_{eq,w}$          | Dissociation constant of $H^+ \leftrightarrow OH^-$          | 1000  | $g\ m^{-1}\ d^{-1}$ | [49] |

Table 5. Mathematical expressions of the stoichiometric coefficients of each process.

| Stoichiometric coefficient                                                                | Unit              |
|-------------------------------------------------------------------------------------------|-------------------|
| <b>Microalgae growth on ammonia</b>                                                       |                   |
| $v_{1,1a} = -i_{N,ALG}$                                                                   | $gN\ gCOD^{-1}$   |
| $v_{4,1a} = \frac{8i_{C,ALG}}{3} + 8i_{H,ALG} - i_{O,ALG} - \frac{12i_{N,ALG}}{7}$        | $gO_2\ gCOD^{-1}$ |
| $v_{5,1a} = -i_{C,ALG}$                                                                   | $gC\ gCOD^{-1}$   |
| $v_{8,1a} = \frac{i_{N,ALG}}{14}$                                                         | $gH\ gCOD^{-1}$   |
| $v_{10,1a} = 1$                                                                           | $gCOD\ gCOD^{-1}$ |
| <b>Microalgae growth on nitrate</b>                                                       |                   |
| $v_{3,1b} = -i_{N,ALG}$                                                                   | $gN\ gCOD^{-1}$   |
| $v_{4,1b} = \frac{8i_{C,ALG}}{3} + 8i_{H,ALG} - i_{O,ALG} - \frac{20i_{N,ALG}}{7}$        | $gO_2\ gCOD^{-1}$ |
| $v_{5,1b} = -i_{C,ALG}$                                                                   | $gC\ gCOD^{-1}$   |
| $v_{8,1b} = -\frac{i_{N,ALG}}{14}$                                                        | $gH\ gCOD^{-1}$   |
| $v_{10,1b} = 1$                                                                           | $gCOD\ gCOD^{-1}$ |
| <b>Microalgae endogenous respiration</b>                                                  |                   |
| $v_{1,2} = i_{N,ALG}$                                                                     | $gN\ gCOD^{-1}$   |
| $v_{4,2} = (i_{O,ALG}) - 8(i_{H,ALG}) - \frac{8}{3}(i_{C,ALG}) + \frac{12}{7}(i_{N,ALG})$ | $gO_2\ gCOD^{-1}$ |
| $v_{5,2} = i_{C,ALG}$                                                                     | $gC\ gCOD^{-1}$   |
| $v_{8,2} = -\frac{1}{14}(i_{N,ALG})$                                                      | $gH\ gCOD^{-1}$   |
| $v_{10,2} = -1$                                                                           | $gCOD\ gCOD^{-1}$ |
| <b>Microalgae inactivation</b>                                                            |                   |
| $v_{1,3} = i_{N,ALG}$                                                                     | $gN\ gCOD^{-1}$   |
| $v_{4,3} = (i_{O,ALG}) - 8(i_{H,ALG}) - \frac{8}{3}(i_{C,ALG}) + \frac{12}{7}(i_{N,ALG})$ | $gO_2\ gCOD^{-1}$ |
| $v_{5,3} = i_{C,ALG}$                                                                     | $gC\ gCOD^{-1}$   |
| $v_{8,3} = -\frac{1}{14}(i_{N,ALG})$                                                      | $gH\ gCOD^{-1}$   |
| $v_{10,3} = -1$                                                                           | $gCOD\ gCOD^{-1}$ |
| <b>Chemical equilibria <math>CO_2 \leftrightarrow HCO_3^-</math></b>                      |                   |
| $v_{5,4} = -1$                                                                            | $gC\ gC^{-1}$     |
| $v_{6,4} = 1$                                                                             | $gC\ gC^{-1}$     |
| $v_{8,4} = 1/12$                                                                          | $gH\ gC^{-1}$     |
| <b>Chemical equilibria <math>HCO_3^- \leftrightarrow CO_3^{2-}</math></b>                 |                   |
| $v_{6,5} = -1$                                                                            | $gC\ gC^{-1}$     |
| $v_{7,5} = 1$                                                                             | $gC\ gC^{-1}$     |
| $v_{8,5} = 1/12$                                                                          | $gH\ gC^{-1}$     |
| <b>Chemical equilibria <math>NH_4^+ \leftrightarrow NH_3</math></b>                       |                   |
| $v_{1,6} = -1$                                                                            | $gN\ gN^{-1}$     |
| $v_{2,6} = 1$                                                                             | $gN\ gN^{-1}$     |
| $v_{8,6} = 1/14$                                                                          | $gH\ gN^{-1}$     |
| <b>Chemical equilibria <math>H^+ \leftrightarrow OH^-</math></b>                          |                   |

|                                                  |                     |
|--------------------------------------------------|---------------------|
| $v_{8,7} = 1$                                    | gH gH <sup>-1</sup> |
| $v_{9,7} = 1$                                    | gH gH <sup>-1</sup> |
| <b>Oxygen transfer to the atmosphere</b>         |                     |
| $v_{4,O_2} = 1$                                  | —                   |
| <b>Carbon dioxide transfer to the atmosphere</b> |                     |
| $v_{5,CO_2} = 1$                                 | —                   |
| <b>Ammonia transfer to the atmosphere</b>        |                     |
| $v_{2,NH_3} = 1$                                 | —                   |

Table 6. Values of fraction of carbon, hydrogen, oxygen and nitrogen in microalgae biomass.

| Parameter                              | Description                        | Value | Unit                               | Source |
|----------------------------------------|------------------------------------|-------|------------------------------------|--------|
| <b>Fractions of microalgal biomass</b> |                                    |       |                                    |        |
| $i_{C,ALG}$                            | Fraction of carbon in microalgae   | 0.387 | gC gCOD <sup>-1</sup>              | [49]   |
| $i_{H,ALG}$                            | Fraction of hydrogen in microalgae | 0.075 | gH gCOD <sup>-1</sup>              | [49]   |
| $i_{O,ALG}$                            | Fraction of oxygen in microalgae   | 0.538 | gO <sub>2</sub> gCOD <sup>-1</sup> | [49]   |
| $i_{N,ALG}$                            | Fraction of nitrogen in microalgae | 0.065 | gN gCOD <sup>-1</sup>              | [49]   |

Table 7. Values of calibrated parameters.

| Parameter   | Description                                  | Value               |
|-------------|----------------------------------------------|---------------------|
| $\mu_{ALG}$ | Maximum specific growth rate of algae        | 1.5 d <sup>-1</sup> |
| $Ka, O_2$   | Mass transfer coefficient for oxygen         | 4 d <sup>-1</sup>   |
| $Ka, CO_2$  | Mass transfer coefficient for carbon dioxide | 0.6 d <sup>-1</sup> |
| $Ka, NH_3$  | Mass transfer coefficient for ammonia        | 0.6 d <sup>-1</sup> |

## References

- [36] B. Liu, R. Jordan, The interrelationship and characteristic distribution of direct, diffuse and total solar radiation, Sol. Energy 4 (3) (July 1960) 1–19.
- [38] E. Molina Grima, G. Acien Fernández, Y. Chisti, Photobioreactors: light regime, mass transfer, and scaleup, J. Biotechnol. 70 (1999) 231–247.
- [43] J.T. Novak, D.E. Brune, Inorganic carbon limited growth kinetics of some freshwater algae, Water Res. 19 (1985) 215–225.

1. Solimeno, A., et al., *New mechanistic model to simulate microalgae growth*. Algal Research, 2015. **12**: p. 350-358.
